# Supplementary material for: Real-world keystroke dynamics are a potentially valid biomarker for clinical disability in multiple sclerosis
Source: PubMed Central journal article supplement — Mult Scler. 2020 Nov 5;27(9):1421–31. doi: 10.1177/1352458520968797 (PMC8358561; doi:10.1177/1352458520968797), 2020-11-05
Supplement: MSJ968797_supplementary_figure.pdf [file MSJ968797_supplementary_figure.pdf]

Supplementary Figure: Heat map of keystroke event count per participant per day

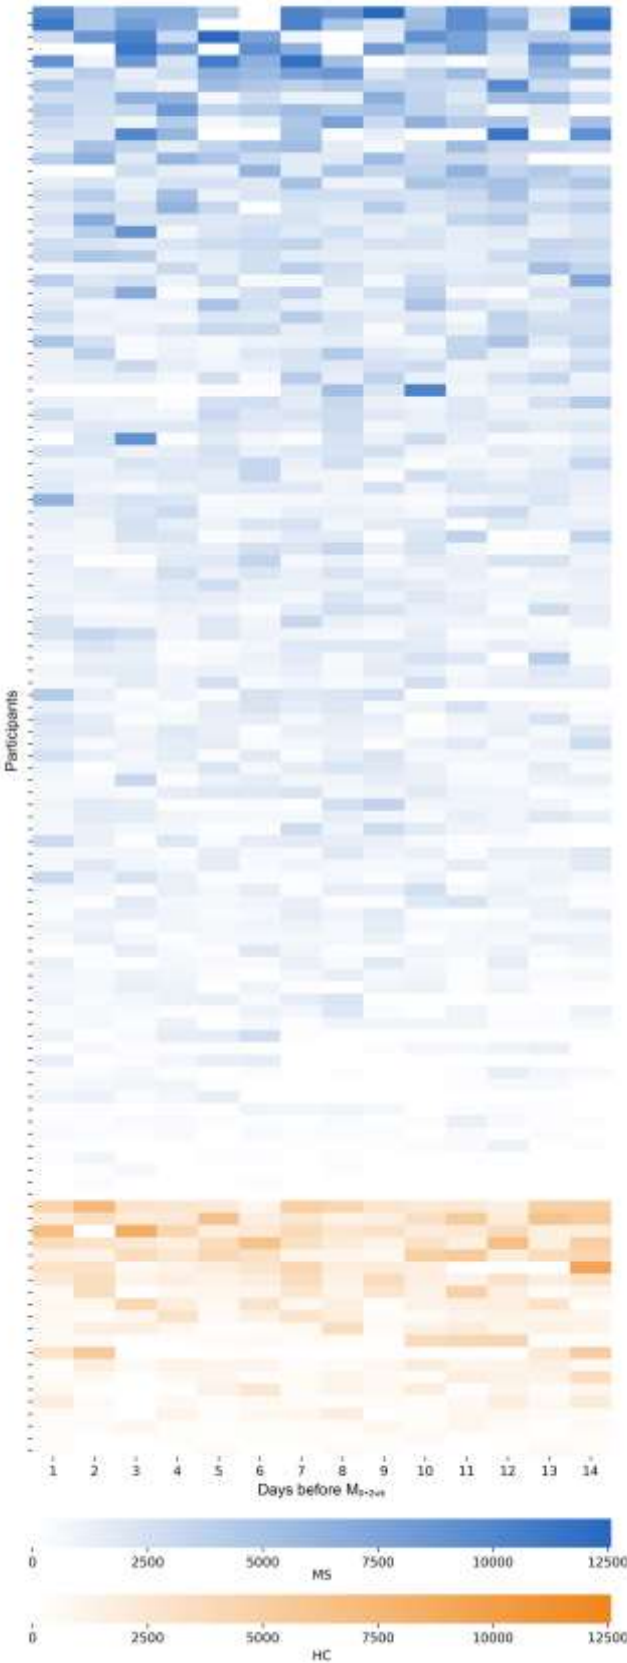

Abbreviations: MS, patients with multiple sclerosis; HC, healthy controls.
